# Supplementary material
Source: Springer Nature journal article supplement (https://www.springermedizin.de/resource/supplementary/12885_2008_1551_MOESM5_ESM.pdf/9472302)

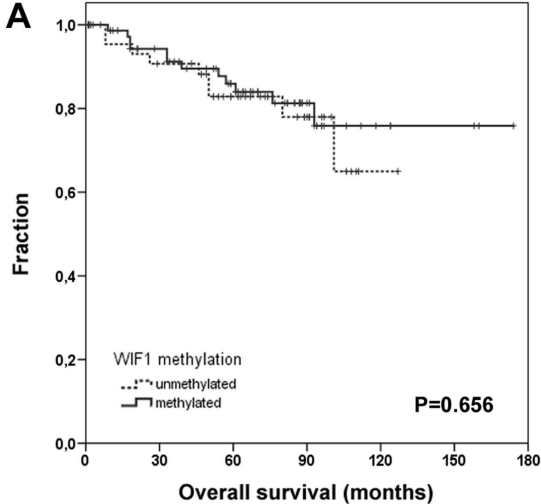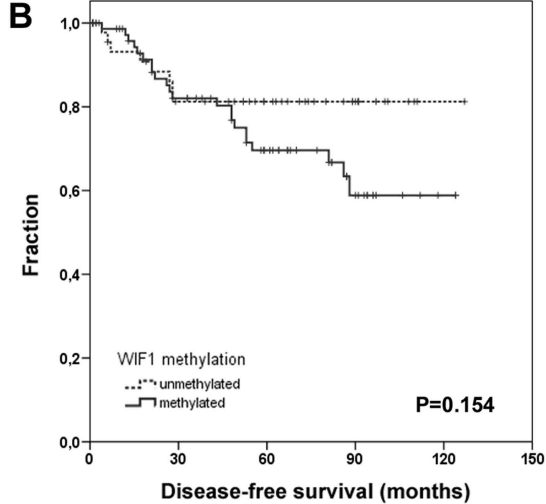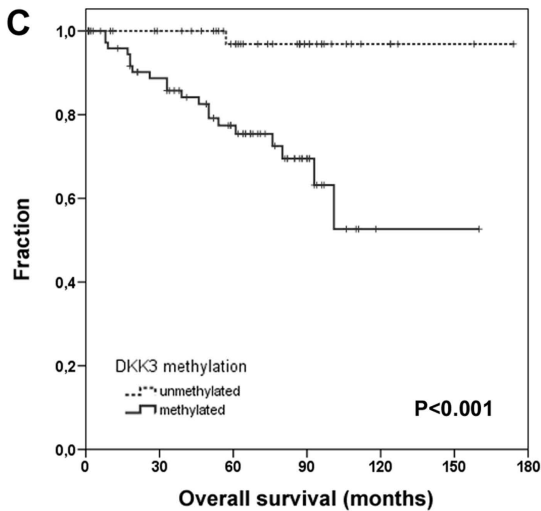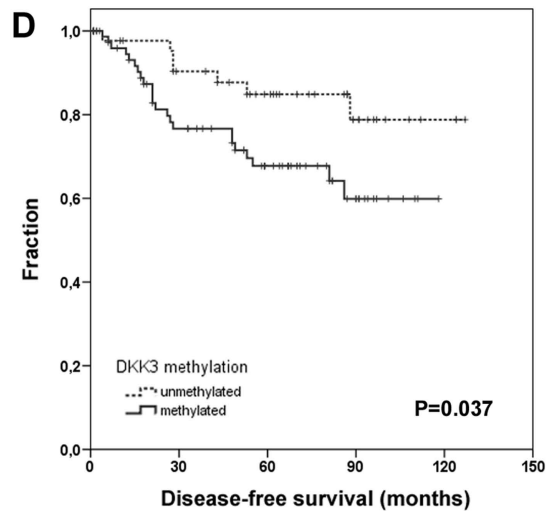

Supplement: MOESM5 [file 9472302]
